# Supplementary material
Source: PubMed Central journal article supplement (PMC3754730)
Supplement: JB.00468-13_zjb999092778so1.pdf [file JB.00468-13_zjb999092778so1.pdf]

1 Supplemental data to

2

3 **Time-Delayed *in vivo* Assembly of Subunit *a* into Preformed**  
4 ***Escherichia coli* F<sub>0</sub>F<sub>1</sub>-ATP Synthase**

5

6 **Britta Brockmann, Kim Danielle Koop genannt Hoppmann, Henrik Strahl, Gabriele**  
7 **Deckers-Hebestreit**

8

9 Abteilung Mikrobiologie, Fachbereich Biologie/Chemie, Universität Osnabrück, D-49069  
10 Osnabrück, Germany

11

1 TABLE S1 Primers for real-time RT-PCR and mutagenesis

| 2             | 3           | 4                    | 5                                                                                      | 6               |
|---------------|-------------|----------------------|----------------------------------------------------------------------------------------|-----------------|
| Primer number | Primer name | Sequenz (5' → 3')    | Annealing in pBWU13                                                                    |                 |
| 6             | 1           | RT3-s                | CAG GCG CAG GCG GAA ATT G                                                              | 1626-1645       |
| 7             | 2           | atpF-rev             | CCG TAA TAA ATT CAG ACA TCA GCC CC                                                     | 1821-1796       |
| 8             | 3           | atpA1-for            | GCG AAC TGA TCA AGC AGC GC                                                             | 2374-2393       |
| 9             | 4           | RT6-as               | ACC CAT AAC AAC CGC ACC TAC                                                            | 2579-2559       |
| 10            | 5           | rpsL-for             | GGT ACG CAA ACC ACG TGC TCG                                                            | --              |
| 11            | 6           | rpsL-rev             | CAG GTT GTG ACC TTC ACC ACC                                                            | --              |
| 12            | 7           | atpI-KpnI-for        | CGT GGG TTT TGG <u>T</u> <b>A</b> C <u>C</u> <b>G</b> G TGG TTC AG                     | 85-110          |
| 13            | 8           | atpI-KpnI-rev        | CTG AAC CAG <u>C</u> <b>G</b> G <u>T</u> <b>A</b> C CAA AAC CCA CG                     | 110-85          |
| 14            | 9           | D_atpB_s             | GCT GGT GGA TCC ACA AAA CCC                                                            | 235-255         |
| 15            | 10          | D_atpB_as            | GCG CGG GAT CCA CTG TGA CCA <u>C</u> <b>T<b>A</b> CGG<br/>CAA C</b>                    | 868-838         |
| 17            | 11          | D_atpB11_s           | CGC AGG ATT <u>A</u> <b>G<b>A</b> TAG GAC ACC</b>                                      | 177-197         |
| 18            | 12          | D_atpB11_as          | GGT GTC CTA <u>T</u> <b>C<b>T</b> AAT CCT GCG</b>                                      | 197-177         |
| 19            | 13          | ΔatpB-s              | GTA ATT AAC AAC AAA GGG TAA TTT ACC<br>AAC ACT ACT ACG                                 | 126-146/971-988 |
| 21            | 14          | ΔatpB-as             | CGT AGT AGT GTT GGT AAA TTA CCC TTT<br>GTT GTT AAT TAC                                 | 988-971/146-126 |
| 23            | 15          | atpB-AseI            | GAA GAA CAT TAA TTT ACC AAC                                                            | 959-979         |
| 24            | 16          | atpF-C21A            | GGC TGC CAT TAA TGG CGG CCA TAC GTA<br>CTT CAT <u>G</u> <b>G<b>C</b> GAA CAG AAC G</b> | 1413-1368       |
| 26            | 17          | pET22-atpB-NdeI      | <i>GAG ATA TAC ATA TGG CTT CAG AAA ATA</i><br><i>TGA CG</i>                            | 155-175         |
| 28            | 18          | pET22-atpB-EcoRI     | <i>GGA GCT CGA ATT CTT AAT GTT CTT CAG</i><br><i>ACG CC</i>                            | 970-952         |
| 30            | 19          | pET-atpB-GTG-s-lang  | CTG AAG CCA <u>C</u> <b>A</b> T <i>GTA TAT CTC CTT C</i>                               | 155-164         |
| 31            | 20          | pET-atpB-GTG-as-lang | <i>GAA GGA GAT ATA CAT</i> <u>G</u> <b>T<b>G</b> GCT TCA G</b>                         | 164-155         |
| 32            | 21          | pET-atpB-TTG-s-lang  | CTG AAG CCA <u>A</u> <b>A</b> T <i>GTA TAT CTC CTT C</i>                               | 155-164         |
| 33            | 22          | pET-atpB-TTG-as-lang | <i>GAA GGA GAT ATA CAT</i> <u>T</u> <b>T<b>G</b> GCT TCA G</b>                         | 164-155         |

35 Changes compared to the sequence of the wild type *atp* operon are in bold letters and under-  
 36 lined, whereas nucleotides of pET-22b are in italics. Numbering of the annealing region with-  
 37 in the *atp* genes corresponds to plasmid pBWU13 starting with 1 at the second HindIII restric-  
 38 tion site in *atpI*.

39

1 TABLE S2 Construction of plasmids

| 2  |                                                                                                          |                 |                                  |                  |                                      |
|----|----------------------------------------------------------------------------------------------------------|-----------------|----------------------------------|------------------|--------------------------------------|
| 3  | Plasmid                                                                                                  | Vector fragment |                                  | Insert           | Effect                               |
| 4  |                                                                                                          | Vector          | Vector or                        | Site(s) used for |                                      |
| 5  |                                                                                                          |                 | Template/Primer No. <sup>a</sup> | Cloning          |                                      |
| 6  |                                                                                                          |                 |                                  |                  |                                      |
| 7  |                                                                                                          |                 |                                  |                  |                                      |
| 8  | pKH4 derivatives: <i>atp</i> genes are under control of the weak, constitutive <i>atp</i> promoter P3    |                 |                                  |                  |                                      |
| 9  | pBH12                                                                                                    | pKH4            | pBWU13                           | ScaI/EagI        | WT <i>atp</i> operon                 |
| 10 | pBH13                                                                                                    | pBH12           | pBWU13 / 7+8                     | SspI             | KpnI after P3 in <i>atpI</i>         |
| 11 | pBRO1                                                                                                    | pBH13           | pJGA1 / 7+8                      | HindIII/SphI     | $\Delta atpB$                        |
| 12 | pJS1                                                                                                     | pBH13           | pBH13 / 9+10                     | BamHI            | <i>aW23</i> 1end                     |
| 13 | pKK1                                                                                                     | pBH13           | pBH13 / 11+12                    | SspI             | <i>aY11</i> end                      |
| 14 |                                                                                                          |                 |                                  |                  |                                      |
| 15 | pBWU13 derivatives: <i>atp</i> genes are under control of the weak, constitutive <i>atp</i> promoter P3  |                 |                                  |                  |                                      |
| 16 | pBH2                                                                                                     | pSTK3           | pKH4                             | BssHII/EagI      | Cys-less, His <sub>6</sub> - $\beta$ |
| 17 |                                                                                                          |                 |                                  |                  | <i>atpG</i> : - BsrGI (silent)       |
| 18 | pBH10                                                                                                    | pBWU13          | pBH2                             | RsrII/PmeI       | <i>atpG</i> : - BsrGI (silent)       |
| 19 | pJGA1                                                                                                    | pBH10           | pBWU13 / 13+14                   | HindIII/BsrGI    | $\Delta atpB$                        |
| 20 | pSTK3                                                                                                    | pBWU13          | pBWU13 / 15+16                   | AseI             | <i>bC21A</i>                         |
| 21 |                                                                                                          |                 |                                  |                  |                                      |
| 22 | pBAD33 derivatives: <i>atp</i> genes are under control of the arabinose-inducible <i>araBAD</i> promoter |                 |                                  |                  |                                      |
| 23 | pBAD33.atp                                                                                               | pBAD33          | pBH13                            | KpnI/XbaI        | WT <i>atp</i> operon                 |
| 24 | pBAD33. $\Delta a$                                                                                       | pBAD33.atp      | pJS1                             | KpnI/XbaI        | <i>aW23</i> 1end                     |
| 25 | pBAD33. $\Delta a2$                                                                                      | pBAD33.atp      | pKK1                             | KpnI/XbaI        | <i>aY11</i> end                      |
| 26 | pBAB33. $\Delta a3$                                                                                      | pBAD33.atp      | pBRO1                            | KpnI/XbaI        | $\Delta atpB$                        |
| 27 |                                                                                                          |                 |                                  |                  |                                      |
| 28 | pET-22b derivatives: <i>atpB</i> gene is under control of the IPTG-inducible T7- <i>laco</i> promoter    |                 |                                  |                  |                                      |
| 29 | pET22-atpB                                                                                               | pET-22b         | pBWU13 / 17+18                   | NdeI/EcoRI       | <i>a</i> , start codon ATG           |
| 30 | pET22-atpB-GTG                                                                                           | pET22-atpB      | pET22-atpB / 19+20               | NcoI/SpHI        | <i>a</i> , start codon GTG           |
| 31 | pET22-atpB-TTG                                                                                           | pET22-atpB      | pET22-atpB / 21+22               | NcoI/SpHI        | <i>a</i> , start codon TTG           |
| 32 |                                                                                                          |                 |                                  |                  |                                      |

33 Plasmids were obtained by cloning of corresponding inserts carrying the adequate mutations or  
 34 by two-step PCR cloning. The numbers of the mutagenic primers used are given in the table,  
 35 while the cloning primers correspond in each case to the restriction sites used for cloning.

36 <sup>a</sup> Primer sequences were listed with the corresponding number in Table S1.

37

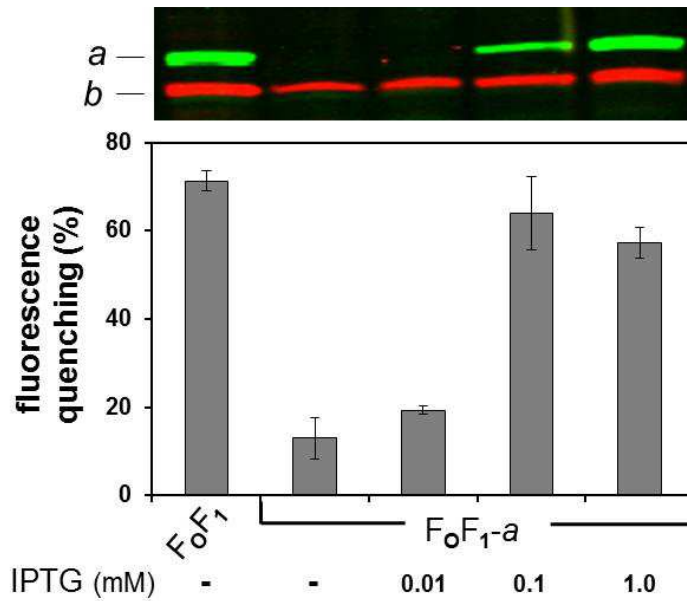

1  
2  
3  
4  
5  
6  
7  
8  
9  
10  
11

**Figure S1.** Induction of the T7-*laco* promoter controlling the expression of *atpB* by IPTG. DK8 transformed with pBAD33.*atp*, pET-22*b*, pT7POL26 (F<sub>0</sub>F<sub>1</sub>), and pBAD33.Δ*a*3, pET22-*atpB*, pT7POL26 (F<sub>0</sub>F<sub>1</sub>-*a*; ATG), respectively, was grown as described in Fig. 3B using IPTG concentrations as indicated. Cells were harvested at OD = 0.8-1.0 and inverted membrane vesicles were prepared. Upper panel, immunoblot analysis of membrane vesicles (20 μg protein/lane). Immunolabeling was performed using monoclonal mouse anti-*a* (green) and polyclonal rabbit anti-*b* antibodies (red). Lower panel, ATP-driven proton translocation of membrane vesicles measured *via* ACMA fluorescence quenching. The relative magnitude of quenching induced by the addition of ATP is shown.

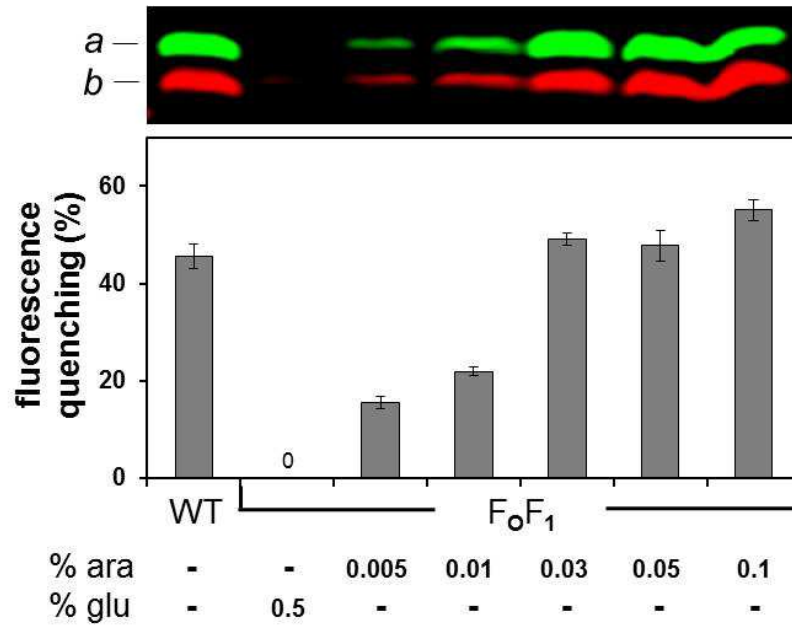

1

2 **Figure S2.** Induction of *araBADp* controlling expression of *atp* genes. Cells of *E. coli* DK8  
 3 transformed with pBWU13 (WT, control) and with pBAD33.atp, pET-22b, pT7POL26  
 4 (F<sub>0</sub>F<sub>1</sub>), respectively, were grown in LB medium supplemented with the corresponding anti-  
 5 biotics and with arabinose or glucose concentrations as indicated. Cells were harvested at OD  
 6 = 0.8-1.0 and inverted membrane vesicles prepared. Upper panel, immunoblot analysis of  
 7 membranes (20 μg protein/lane). Immunolabeling was performed using monoclonal mouse  
 8 anti-*a* (green) or polyclonal rabbit anti-*b* antibodies (red). Lower panel, ATP-driven proton  
 9 translocation of membrane vesicles measured *via* ACMA fluorescence quenching. The  
 10 relative magnitude of quenching induced by the addition of ATP is shown. ara, arabinose; glu,  
 11 glucose.

12

13

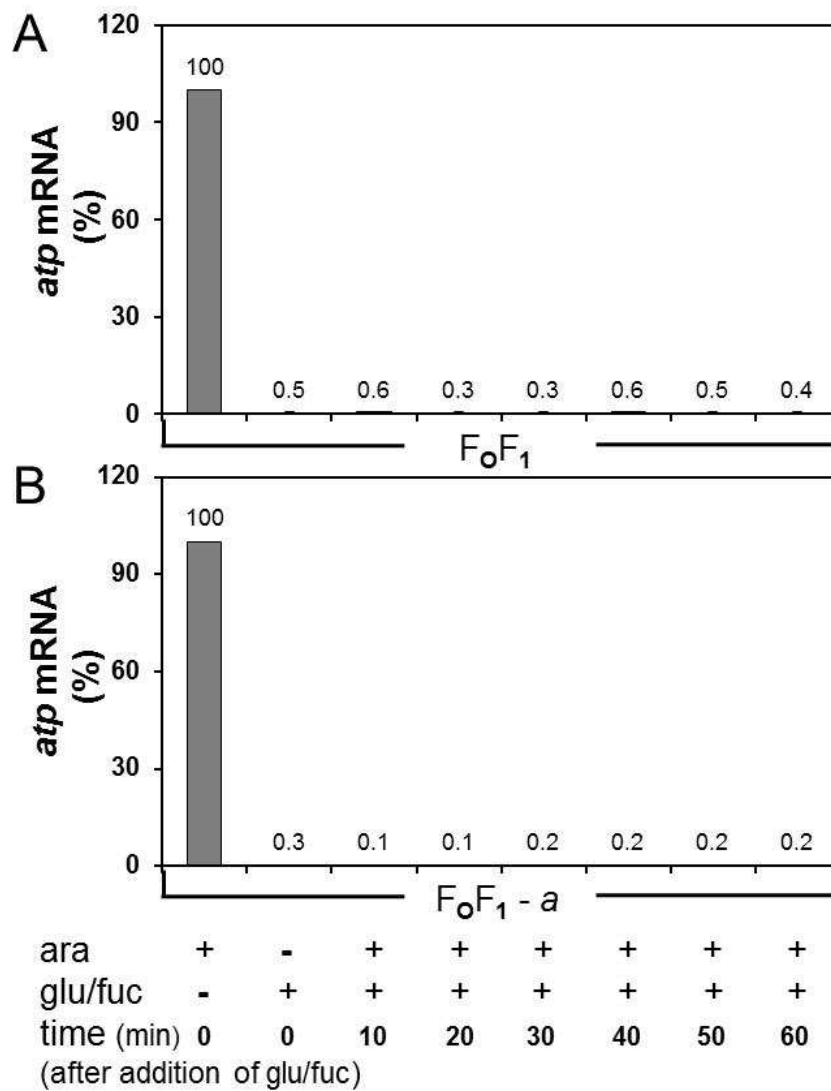

1

2 **Figure S3.** Degradation of *atp* mRNA after repression of *araBADp* controlling expression of  
 3 *atpEFHAGDC* by glucose/D-fucose. DK8 carrying plasmids (A) pBAD33.atp, pET-22b,  
 4 pT7POL26 (F<sub>0</sub>F<sub>1</sub>) or (B) pBAD33.Δa3, pET22-atpB-GTG, pT7POL26 (F<sub>0</sub>F<sub>1</sub>-a) was grown  
 5 as described in Fig. 5. At each time point indicated, cells were harvested for isolation of total  
 6 RNA. Real-time RT-PCR was performed using primer pair *atpE'F* (1/2). The amount of *atp*  
 7 mRNA present in the samples grown in the presence of arabinose was set to 100 %. 100 % of  
 8 F<sub>0</sub>F<sub>1</sub>-a corresponds to 54 % of F<sub>0</sub>F<sub>1</sub> for *atpE'F* (1/2).
